# Supplementary material for: Synthesis of high melting point TiN mesocrystal powders by a metastable state strategy
Source: Royal Society of Chemistry journal article supplement (doi:10.1039/c8ce02156b), 2019-01-01
Supplement: c8ce02156b1.pdf [file c8ce02156b1.pdf]

## ***Supporting Information for***

### **Synthesis of high melting point TiN mesocrystal powders by a metastable state strategy**

Maoqiao Xiang,<sup>a</sup> Miao Song,<sup>ab</sup> Qingshan Zhu,<sup>\*ab</sup> Yafeng Yang,<sup>\*a</sup> Shaofu Li,<sup>a</sup>  
Chaoquan Hu,<sup>a</sup> Pengpeng Lv,<sup>a</sup> Feng Pan<sup>a</sup> and Yu Ge<sup>a</sup>

<sup>a</sup> State Key Laboratory of Multiphase Complex Systems, Institute of Process  
Engineering, Chinese Academy of Sciences, P.O. Box 353, Beijing 100190, PR China

<sup>b</sup> University of Chinese Academy of sciences, Beijing 100049, PR China

**\*Corresponding author:** Qingshan Zhu; E-mail: [qszhu@ipe.ac.cn](mailto:qszhu@ipe.ac.cn); Tel: +86-010-62536108; Fax: +86-010-62536108;

**\*Corresponding author:** Yafeng Yang; E-mail: [yfyang@ipe.ac.cn](mailto:yfyang@ipe.ac.cn); Tel: +86-010-82544907; Fax: +86-010-82544907.

## I. Preparing the metastable $\text{TiCl}_2$ powders

The Ti powder (38  $\mu\text{m}$ , purity 99.8%) and  $\text{TiCl}_4$  (purity 99.9%) were bought from Xing Rong Yuan Technology Co., Ltd. Beijing, China and Macklin Inc. Shanghai, China. A fluidized bed process was employed to prepare the metastable  $\text{TiCl}_2$  powder (Fig.S1.a). This is because the fluidized bed process has the advantage of high heat efficiency and mass transfer property and is suitable for mass production. Firstly, the Ti powders (6.0 g) were put in the fluidized bed. Secondly, Ar was used to wash the fluidized bed (Ar = 300 ml/min, 40 min) for eliminating air at about 150  $^\circ\text{C}$ . Then, the temperatures of the  $\text{TiCl}_4$  container and the fluidized bed (Fig.S1) were increased to 70  $^\circ\text{C}$  and 600  $^\circ\text{C}$ , respectively. Meanwhile, the flow velocity of Ar was 600 ml/min. After 3 hours the black  $\text{TiCl}_2$  powders were obtained.

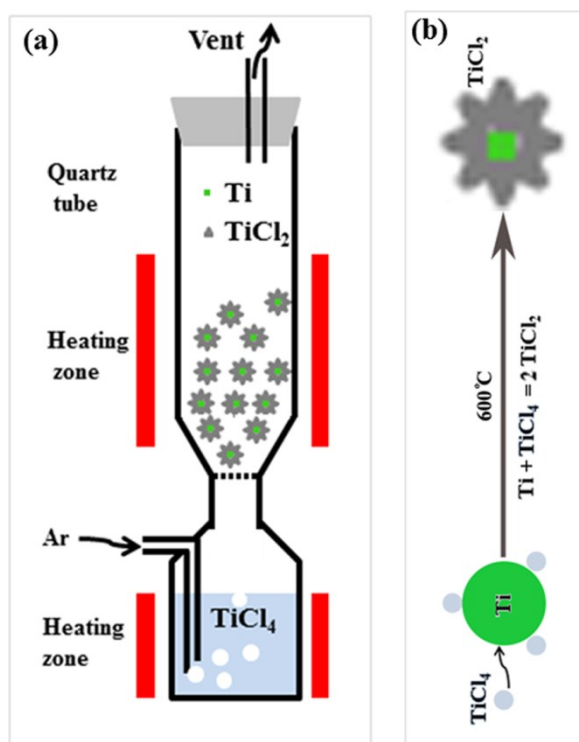

**Fig.S1.** (a) Schematic diagram of preparing  $\text{TiCl}_2$  precursor by fluidized bed process.

(b) Schematic diagram of synthetic process of  $\text{TiCl}_2$ .

However, the synthesized  $\text{TiCl}_2$  precursors were  $\text{TiCl}_2$  and Ti mixtures (Fig.S2.a). The Ti powders were uniformly covered by the  $\text{TiCl}_2$  film (Fig.S2.b and c). This is because the  $\text{TiCl}_2(\text{s})$  formed on the surface of  $\text{Ti}(\text{s})$  powder at early stage acted as the

barrier for further reaction between  $\text{TiCl}_4(\text{g})$  and  $\text{Ti}(\text{s})$  (Fig.S2.a.2). However, our design idea is based on the gaseous  $\text{TiCl}_2(\text{g})$  to synthesize  $\text{TiN}$  powders. The vapor pressure of  $\text{Ti}(\text{s})$  is much lower than that of  $\text{TiCl}_2(\text{s})$ . Hence, the residual  $\text{Ti}$  cores in the  $\text{TiCl}_2$  powders have little influence on the  $\text{TiN}$  synthesis.

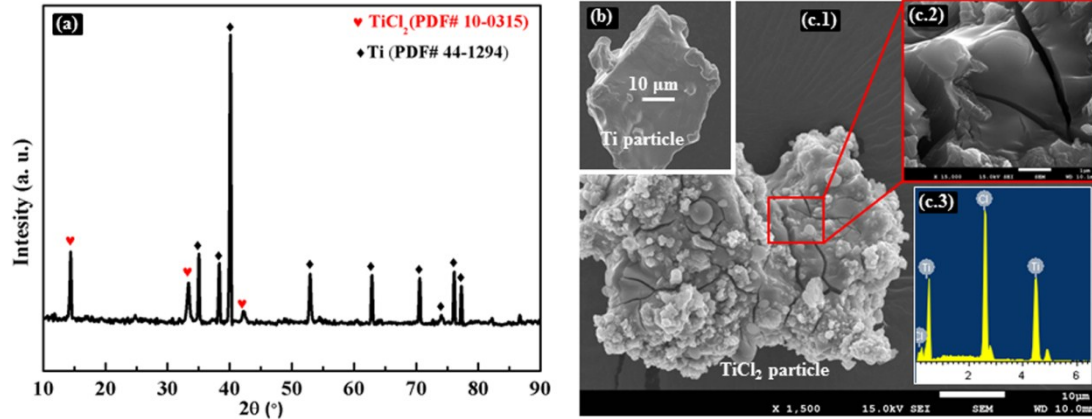

**Fig.S2.** (a) XRD pattern of the synthesized black  $\text{TiCl}_2$  powders; (b) SEM image of the  $\text{Ti}$  particle before reaction; (c.1) and (c.1) SEM of images of the synthesized black  $\text{TiCl}_2$  particle; (c.3) EDS pattern of the  $\text{TiCl}_2$  powder.

## II. Synthesizing the $\text{TiN}$ mesocrystal powders

The synthesized  $\text{TiCl}_2$  powders were transferred in to a special quartz crucible located in a tube furnace (Fig. S3). The solid state  $\text{TiCl}_2(\text{s})$  powders were sublimated into gas state  $\text{TiCl}_2(\text{g})$  and transported to the reaction zones. Meanwhile, the metastable gaseous  $\text{TiCl}_2(\text{g})$  could release fresh  $\text{Ti}$  atoms by its disproportionate reaction or react with nitrogen sources directly to form  $\text{TiN}$  powders. The synthesis temperatures were varied from  $750\text{ }^\circ\text{C}$  to  $900\text{ }^\circ\text{C}$ . The synthesis time was 30 minutes. Different nitrogen sources (ammonia gas ( $\text{NH}_3$ ) and nitrogen ( $\text{N}_2$ )) were investigated.

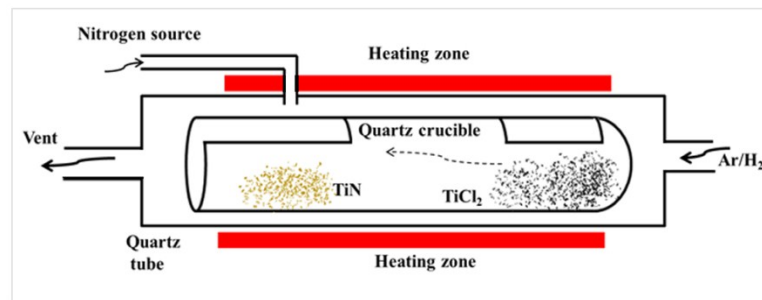

**Fig.S3.** Schematic diagram of preparing  $\text{TiN}$  mesocrystal powders.

### III. The phase analysis and elemental analysis

The elemental analysis were detected by the field emission scanning electron microscopy (FESEM, Semicon, JSM-7001F) equipped with an energy dispersive spectroscopy (EDS) detector, and the results are shown in Fig.S4. The samples were coated by a thin Pt layer (20 mA, 30 seconds) in order to obtain a better conductive surface. The N element, Ti element, and Cl element were detected in all samples, and the content of Cl element decreased as the temperature increased. The phase compositions of all samples in the  $\text{TiCl}_2\text{-NH}_3$  system and  $\text{TiCl}_2\text{-N}_2$  system were identified using an X'Pert PRO X-ray diffractometer (XRD, PANalytical, the Netherlands) with the  $\text{Cu K}\alpha$  (1.542 Å) radiation in the range  $2\theta$  from  $10^\circ$  to  $90^\circ$  with a scanning speed of  $1^\circ \text{ min}^{-1}$ , and the results are shown in Fig.S5. The peaks fitting, phase identification and refinement of XRD profile were examined by PANalytical X'Pert HighScore Plus software. The diffraction peaks are indexed well to a face-centered cubic (FCC) structure with space group of Fm-3m (JCPDS Card No. 38-1420). No other diffraction peaks are detected, indicating the high purity of TiN. The intensities of peaks increased with increasing temperature. The average crystallite size

of TiN powders were calculated using Debye–Scherrer formula,<sup>1</sup> i.e. 
$$D = \frac{0.9\lambda}{\beta \cos\theta},$$
 where, D and  $\lambda$  are the crystallite size and the wavelength of Cu-K $\alpha$  radiation, respectively.  $\theta$  is the Bragg diffraction angle, and  $\beta$  is the full-width-at-half-maximum (FWHM) of the peaks in radians. The crystallite sizes of the TiN powders are shown in table S1. The crystallite sizes o increased from 28.45 nm to 63.41 nm as the temperature increased from 750 °C to 900 °C in the  $\text{TiCl}_2\text{-NH}_3$  system.

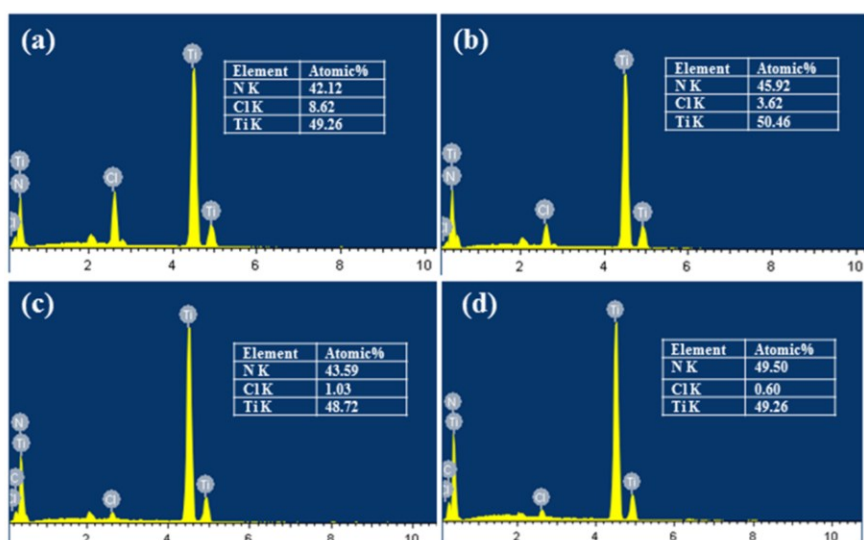

**Fig.S4** The EDS results of the synthesized TiN powders in the  $\text{TiCl}_2\text{-NH}_3$  system at different temperatures: (a) 750 °C, (b) 800 °C, (c) 850 °C, (d) 900 °C.

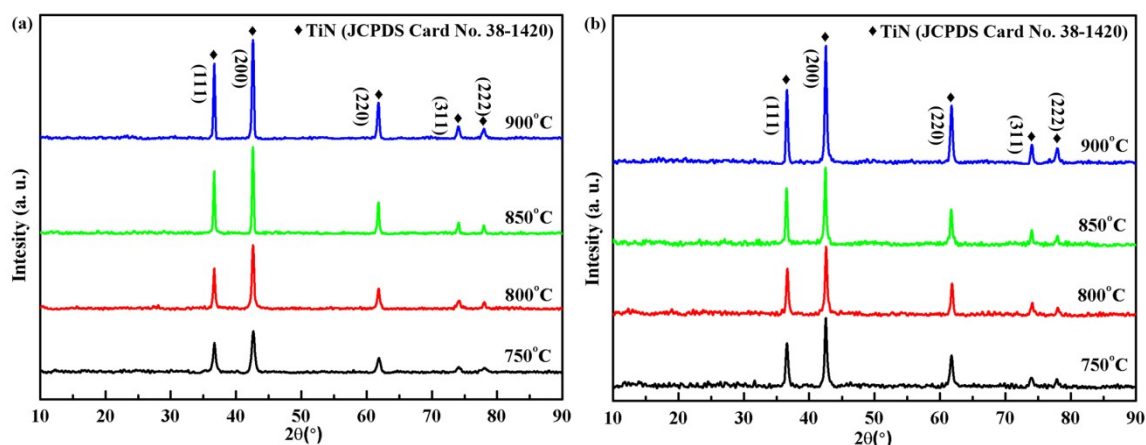

**Fig.S5** (a) The XRD patterns of the synthesized TiN powders in the  $\text{TiCl}_2\text{-NH}_3$  system from 750 °C to 900 °C; (b) the XRD patterns of the synthesized TiN powders in the  $\text{TiCl}_2\text{-N}_2$  system from 750 °C to 900 °C.

**Table S. 1.** Crystallite size of the obtained samples in the  $\text{TiCl}_2\text{-NH}_3$  and  $\text{TiCl}_2\text{-N}_2$  system from 750 °C to 900 °C.

| Temperature (°C) | 750 °C                      | 800 °C | 850 °C | 900 °C |       |
|------------------|-----------------------------|--------|--------|--------|-------|
| D (nm)           | $\text{TiCl}_2\text{-NH}_3$ | 28.45  | 38.65  | 54.82  | 63.41 |
|                  | $\text{TiCl}_2\text{-N}_2$  | 22.13  | 33.74  | 47.25  | 56.29 |

#### IV. Microstructure and specific surface area characterization of obtained TiN powders

Microstructures of all samples were characterized by the field emission scanning electron microscopy (FESEM, Semicon, JSM-7001F). The sizes of the obtained TiN powders were measured by Nano Measurer 1.2 software. All transmission electron microscopy (TEM, 80-200kV/JEM-2100PLUS, Japan) samples were prepared by placing a drop of a solution contained TiN powders onto a carbon coated copper grid. The TEM images were analyzed by the Digital Micrograph software (Ganta, USA). The orientations and morphologies of 2 to 15 nm particles were identified by the fast Fourier transform (FFT) patterns of high resolution transmission electron microscopy (HRTEM) lattice images. Specific surface areas of the obtained samples were determined by nitrogen physical sorption BET measurements using AUTOSORB-IQ-XR-C (Quantachrome, USA) device. The results are shown in Table S2.

**Table S.2.** Specific surface areas of the obtained samples.

| Temperatur<br>e | TiCl <sub>2</sub> -NH <sub>3</sub> -xAr systems |       |
|-----------------|-------------------------------------------------|-------|
|                 | x = 0                                           | x = 2 |
| 750 °C          | 31.24                                           | 36.25 |
| 800 °C          | 23.15                                           | 25.96 |
| 850 °C          | 17.34                                           | 21.45 |
| 900 °C          | 16.59                                           | 18.75 |

#### V. The thermodynamic calculation and analysis

The thermodynamic calculation in this experiment was conducted by HSC Chemistry 6.0 software (Outokumpu Research Oy, Finland). In theory, the metastable TiCl<sub>2</sub> can be converted into Ti, TiCl<sub>3</sub> and TiCl<sub>4</sub> by itself disproportionation in a certain range of temperature. Meanwhile, the TiCl<sub>3</sub> and TiCl<sub>4</sub> can also be reduced to TiCl<sub>2</sub> by Ti powders or H<sub>2</sub>. And each of them can be nitrated by NH<sub>3</sub> or N<sub>2</sub> with H<sub>2</sub> to

form TiN. In addition, the NH<sub>3</sub> can be decomposed into N<sub>2</sub> and H<sub>2</sub>. Hence, there are 17 possible reaction equations (Eqs.) in the system (Table S.3).

**Table S.3.** The possible reactions in the TiCl<sub>2</sub>-NH<sub>3</sub> system.

| Chemical reaction equation                                          | Numbers |
|---------------------------------------------------------------------|---------|
| $TiCl_{2(g)} + H_{2(g)} = Ti_{(s)} + 2HCl_{(g)}$                    | 1       |
| $TiCl_{3(g)} + 3/2H_{2(g)} = Ti_{(s)} + 3HCl_{(g)}$                 | 2       |
| $TiCl_{3(g)} + 1/2H_{2(g)} = TiCl_{2(g)} + HCl_{(g)}$               | 3       |
| $TiCl_{4(g)} + 2H_{2(g)} = Ti_{(s)} + 4HCl_{(g)}$                   | 4       |
| $TiCl_{4(g)} + H_{2(g)} = TiCl_{2(g)} + 2HCl_{(g)}$                 | 5       |
| $TiCl_{4(g)} + 1/2H_{2(g)} = TiCl_{3(g)} + 2HCl_{(g)}$              | 6       |
| $TiCl_{2(g)} = 1/3Ti_{(s)} + 2/3TiCl_{3(g)}$                        | 7       |
| $TiCl_{2(g)} = 1/2Ti_{(s)} + 1/2TiCl_{4(g)}$                        | 8       |
| $TiCl_{3(g)} = 1/2TiCl_{2(g)} + 1/2TiCl_{4(g)}$                     | 9       |
| $TiCl_{3(g)} = 1/4Ti_{(s)} + 3/4TiCl_{4(g)}$                        | 10      |
| $NH_{3(g)} = 3/2H_{2(g)} + 1/2N_{2(g)}$                             | 11      |
| $TiCl_{2(g)} + NH_{3(g)} = TiN_{(s)} + 2HCl_{(g)} + 1/2H_{2(g)}$    | 12      |
| $TiCl_{3(g)} + NH_{3(g)} = TiN_{(s)} + 3HCl_{(g)}$                  | 13      |
| $TiCl_{4(g)} + 4/3NH_{3(g)} = TiN_{(s)} + 4HCl_{(g)} + 1/6N_{2(g)}$ | 14      |
| $Ti_{(s)} + 1/2N_{2(g)} = TiN_{(s)}$                                | 15      |
| $Ti_{(s)} + NH_{3(g)} = TiN_{(s)} + 3/2H_{2(g)}$                    | 16      |
| $TiCl_{2(g)} + 1/2N_{2(g)} + H_{2(g)} = TiN_{(s)} + 2HCl_{(g)}$     | 17      |

Fig. S6 shows Gibbs free energy ( $\Delta G$ ) variations and equilibrium constant (K) variations of the 17 possible reactions. From the point of view of thermodynamics, the reaction with small  $\Delta G$  and big K is the feasible reaction. The Eq.11 shows negative  $\Delta G$  and positive K, implying that the NH<sub>3</sub> can be decomposed into N<sub>2</sub> and H<sub>2</sub>. In order to verify this reaction, the reaction tail gas of TiCl<sub>2</sub>-NH<sub>3</sub> system from 750 °C to 900 °C was monitored by hydrogen detector. And we found that the hydrogen indeed existed in all process. Hence, the hydrogen also plays a role in the TiCl<sub>2</sub>-NH<sub>3</sub> system

for synthesizing TiN powders. The Eqs. (1) to (6) have big positive  $\Delta G$  and very small  $K$ , indicating that the  $\text{TiCl}_2(\text{g})$ ,  $\text{TiCl}_3(\text{g})$  and  $\text{TiCl}_4(\text{g})$  can hardly be reduced by  $\text{H}_2$ . The Eqs. (7) and (8) show more negative  $\Delta G$  values and bigger  $K$  values than the Eqs. (9) and (10), indicating that the conversion of  $\text{TiCl}_2(\text{g})$  into fresh  $\text{Ti}(\text{s})$  is relatively feasible pathway ( $\text{TiCl}_2(\text{g}) \rightarrow \text{Ti}(\text{s}) + \text{TiCl}_3(\text{g})$ ,  $\text{TiCl}_2(\text{g}) \rightarrow \text{Ti}(\text{s}) + \text{TiCl}_4(\text{g})$ ) than the conversion of  $\text{TiCl}_3(\text{g})$ . Hence, the  $\text{TiCl}_4(\text{g})$  and  $\text{TiCl}_3(\text{g})$  by-products are formed inevitably in this system. For the reaction (11) to (17), they show negative  $\Delta G$  and positive  $K$ , implying that the fresh  $\text{Ti}(\text{s})$ ,  $\text{TiCl}_2(\text{g})$ ,  $\text{TiCl}_3(\text{g})$ , and  $\text{TiCl}_4(\text{g})$  can be nitrated by  $\text{NH}_3$  or  $\text{N}_2$  to form TiN. The nitridation reactions of  $\text{Ti}(\text{s})$  (Eqs.15 and 16) show the very negative  $\Delta G$  and the biggest  $K$ , indicating that the  $\text{Ti}(\text{s}) \rightarrow \text{TiN}(\text{s})$  reactions are the most feasible reactions. Meanwhile, the Eqs.12 and 17 show the second low negative  $\Delta G$  and the second big  $K$ , indicating that the  $\text{TiCl}_2(\text{s}) \rightarrow \text{TiN}(\text{s})$  reactions are the second feasible reactions. In addition, it is well known that the pure TiN can only be synthesized at least 1000 °C in the  $\text{TiCl}_4(\text{g})\text{-N}_2\text{-H}_2$  system. Hence, based on the calculation results, the reaction orders can be describes as:  $\text{Ti}(\text{s}) \rightarrow \text{TiN} > \text{TiCl}_2 \rightarrow \text{TiN} > \text{TiCl}_3 \rightarrow \text{TiN} > \text{TiCl}_4 \rightarrow \text{TiN}$ . It is worth to mention that the reactions between the fresh  $\text{Ti}(\text{s})$  and  $\text{TiCl}_4(\text{g})$ ,  $\text{TiCl}_3(\text{g})$  have not been taken into account because the fresh  $\text{Ti}(\text{s})$  from the disproportionation can be consumed immediately by  $\text{NH}_3$  or  $\text{N}_2$ . Therefore, the possible synthesis pathways in the  $\text{TiCl}_2(\text{g})\text{-NH}_3$  system can be divided in to two parts:  $\text{TiCl}_2(\text{g}) \rightarrow \text{Ti}(\text{s}) \rightarrow \text{TiN}(\text{s})$ ,  $\text{TiCl}_2(\text{g}) \rightarrow \text{TiN}(\text{s})$ .



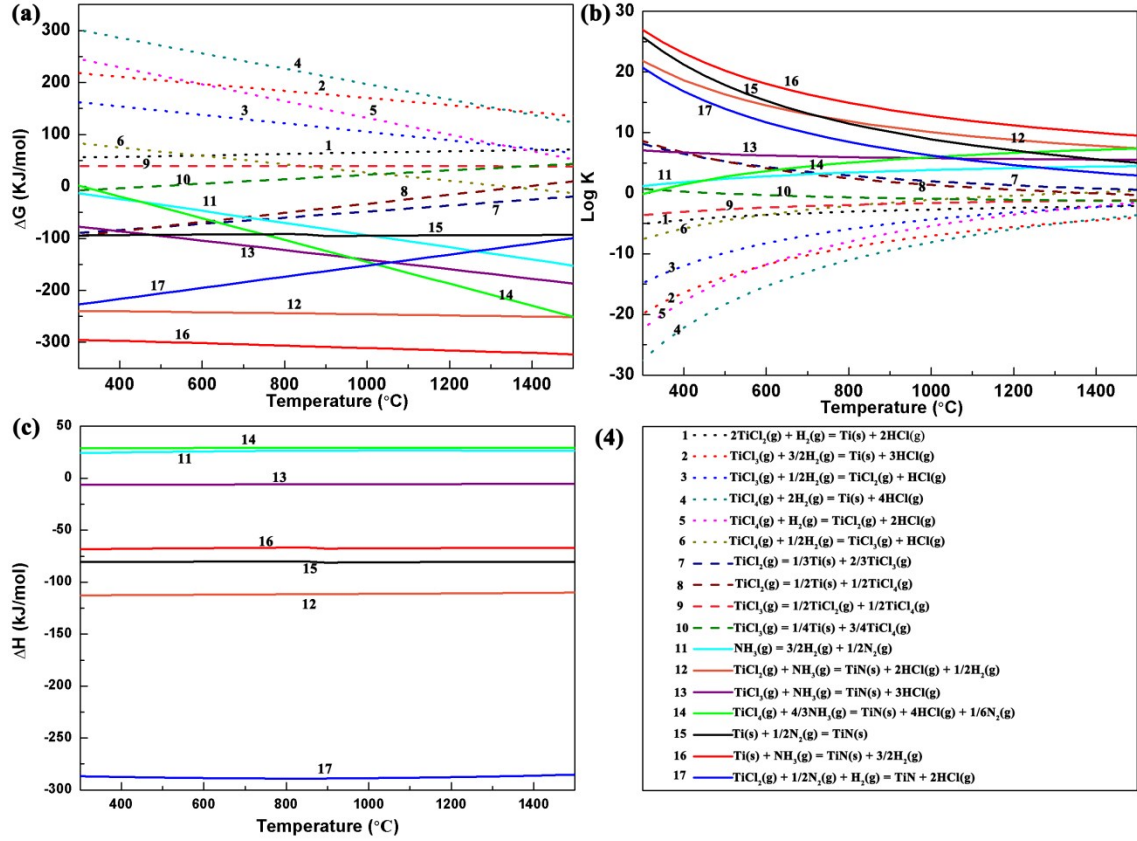

**Fig. S6.** Gibbs free energy variations (a) and the equilibrium constant variations (b) of the  $\text{TiCl}_2\text{-NH}_3$  system at different temperatures. (c) The 17 possible reactions in the  $\text{TiCl}_2\text{-NH}_3$  system.

## VI. The crystal structure and surface energy of TiN

TiN is FCC interstitial compound with NaCl structure (Fig.S7). For FCC structured metals, such as Ag, Au, the surface energies ( $\gamma$ ) can be roughly expressed by the following Eq.:<sup>2</sup>

$$\gamma = \frac{1}{2}N_b\varepsilon\rho_a \quad (2)$$

where the  $N_b$  is the number of the broking bonds,  $\varepsilon$  is the bond energy,  $a$  is the cell parameters, and  $\rho_a$  is the atomic planar density. The faces with the lowest surface energy are the  $\{111\}$  facets,  $\gamma\{111\} = 3.36(\varepsilon/a^2) < \gamma\{100\} = 4(\varepsilon/a^2) < \gamma\{110\} = 4.24(\varepsilon/a^2)$ .<sup>3</sup> For FCC NaCl, the faces with the lowest surface energy are the  $\{100\}$  facets because of its ionic bond.<sup>3</sup> However, the bond structures of TiN are more

complicated than that of NaCl and Ag as the bonds are combination of ionic, covalent, and metallic contribution.<sup>4</sup> At present, the faces with the lowest surface energy in TiN are not well known.<sup>3,5,6</sup> The  $\{111\}$  planes of TiN are the exchange layers of pure Ti and pure N, which possess 2 Ti or N atoms (Fig. S7.a and c). The  $\{100\}$  planes of TiN possess 2 Ti atoms and 1 N atoms (Fig. S7.d and e). It has been reported that the growth rate of  $\{111\}$  planes is lower than that of  $\{100\}$  planes in the  $\text{TiCl}_4\text{-NH}_3$  system.<sup>3</sup> Based on the Wulff's rule, crystal faces with high surface energies exhibit the fastest growth rates.<sup>7,8</sup> Hence, it is reasonable to predict that the faces with the lowest surface energy in TiN are the  $\{111\}$  facets.

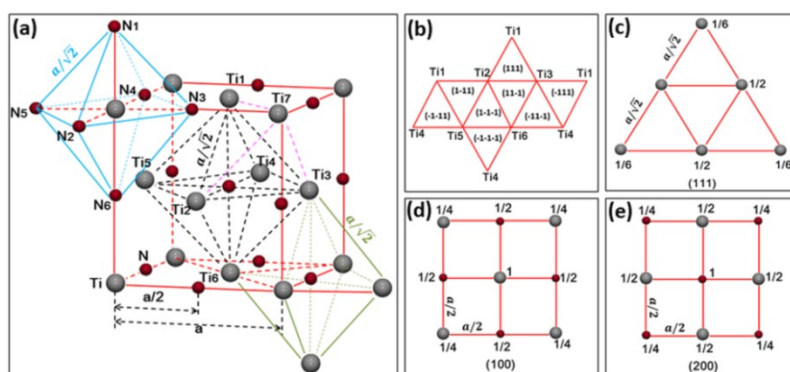

**Fig.S7.** (a) Schematic diagram of FCC structured TiN (grey balls represent Ti atoms, and deep red balls represent N atoms). (b) The expansion view of Ti1~Ti6 octahedron with 8  $\{111\}$  facets. (c) Schematic diagram of (111) plane. (d) and (e) Schematic diagrams of (100) plane and (200) plane, respectively.

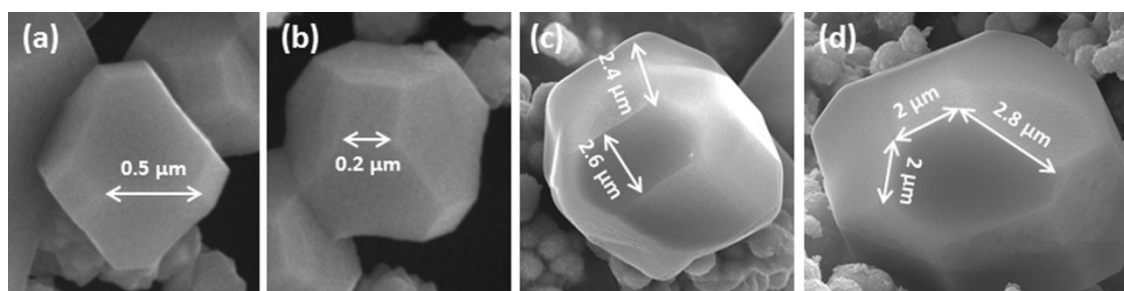

**Fig.S8.** The SEM images of truncated octahedra obtained from  $\text{TiCl}_2(\text{g})\text{-NH}_3\text{-Ar}$  system at 850 °C (a and b) and 900 °C (c and d).

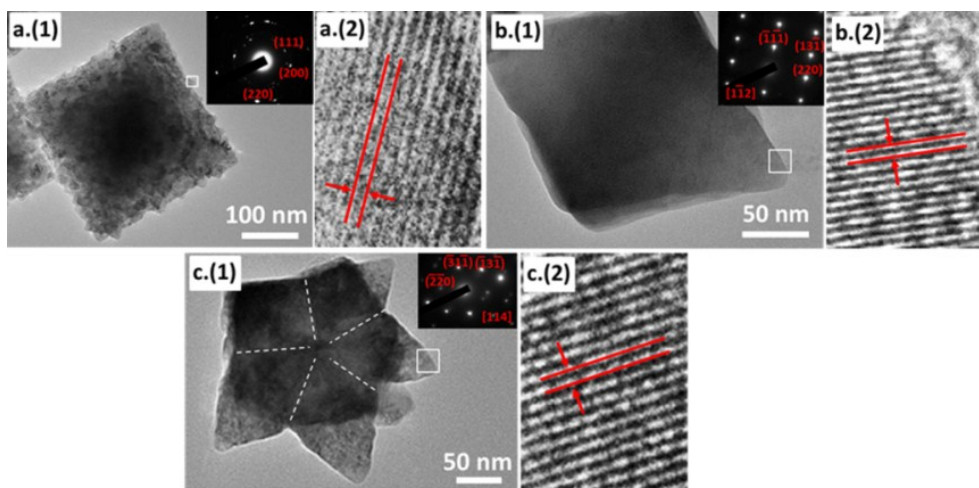

**Fig.S9.** TEM images (1), SAED patterns (insets), and HRTEM images (2) of the powders with octahedron shape. (a) The rough octahedron powder synthesized at 850 °C, (b) and (c) the smooth octahedron synthesized at 900 °C.

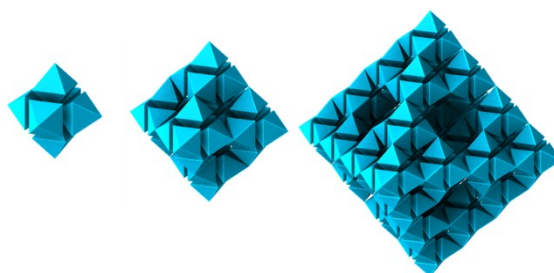

**Fig.S10.** Schematic diagram of the nanooctahedra oriented attachment by sharing the apex along  $[100]$  axes.

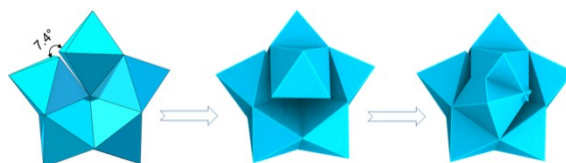

**Fig.S11.** Schematic diagram of 5 nanooctahedra oriented attachment by sharing the apex and  $\{111\}$ .

## VII. References

- 1 J. S. Lee, J. M. Cha, H. Y. Yoon, J. K. Lee, Y. K. Kim, *Scientific Reports*, 2015, **5**, 12135.
- 2 Z. L. Wang, *J. Phys. Chem. B*, 2000, **104**, 1153–1175.
- 3 H. E. Cheng, M. H. Hon, *J. Appl. Phys.*, 1996, **79**, 8047–8053.

- 4 A. Neckel, *The Physics and Chemistry of Carbides; Nitrides and Borides*, edited by R. Freer (Kluwer Academic, Boston), 1990, 485–511.
- 5 J. Pelleg, L. Z. Zevin, S. Lungo, *Thin Solid Films*, 1991, **197**, 117–128.
- 6 C. Quaeqhaegens, G. Knuyt, J. D’Haen, L. M. Stals, *Thin Solid Films*, 1995, **258**, 170–173.
- 7 J. X. Fang, B. J. Ding, H. Gleiter, *Chem. Soc. Rev.*, 2011, **40**, 5347–5360.
- 8 M. Niederberger, H. Cölfen, *Phys. Chem. Chem. Phys.*, 2006, **8**, 3271–3287.
